# Supplementary material for: Cytotoxicity of PEG-Coated Gold and Gold–Iron Alloy Nanoparticles: ROS or Ferroptosis?
Source: MDPI journal article supplement (doi:10.3390/nano13233044), 2023-11-29
Supplement: s1 [file s1]

## Supporting Information

# Cytotoxicity of PEG-Coated Gold and Gold-Iron Alloy Nanoparticles: ROS or Ferroptosis?

Clara M.G. de Faria,<sup>1</sup> Michael Bissoli,<sup>1</sup> Riccardo Vago,<sup>2</sup> Antonello E. Spinelli,<sup>3</sup> Vincenzo Amendola<sup>1\*</sup>

<sup>1</sup> Department of Chemical Sciences, University of Padova, Via Marzolo 1, Padova I-35131, Italy, [claramaria.goncalvesdefaria@unipd.it](mailto:claramaria.goncalvesdefaria@unipd.it); [michael.bissoli@unipd.it](mailto:michael.bissoli@unipd.it)

<sup>2</sup> Division of Experimental Oncology, Urological Research Institute, IRCCS San Raffaele Scientific Institute, Milan, Italy; [vago.riccardo@hsr.it](mailto:vago.riccardo@hsr.it)

<sup>3</sup> Experimental Imaging Center, IRCCS San Raffaele Scientific Institute, Milan, Italy, [spinelli.antonello@hsr.it](mailto:spinelli.antonello@hsr.it)

\* Correspondence: [vincenzo.amendola@unipd.it](mailto:vincenzo.amendola@unipd.it)

### Index:

- 1. XRD of PEG-Au, PEG-Au-Fe n1 and TEOS-PEG-Au-Fe b NPs**
- 2. FTIR of PEG-Au, PEG-Au-Fe n1 and TEOS-PEG-Au-Fe b NPs**
- 3. Z-potential and DLS of PEG-Au, PEG-Au-Fe n1 and TEOS-PEG-Au-Fe b NPs**

# 1. XRD of PEG-Au, PEG-Au-Fe n1 and TEOS-PEG-Au-Fe b NPs

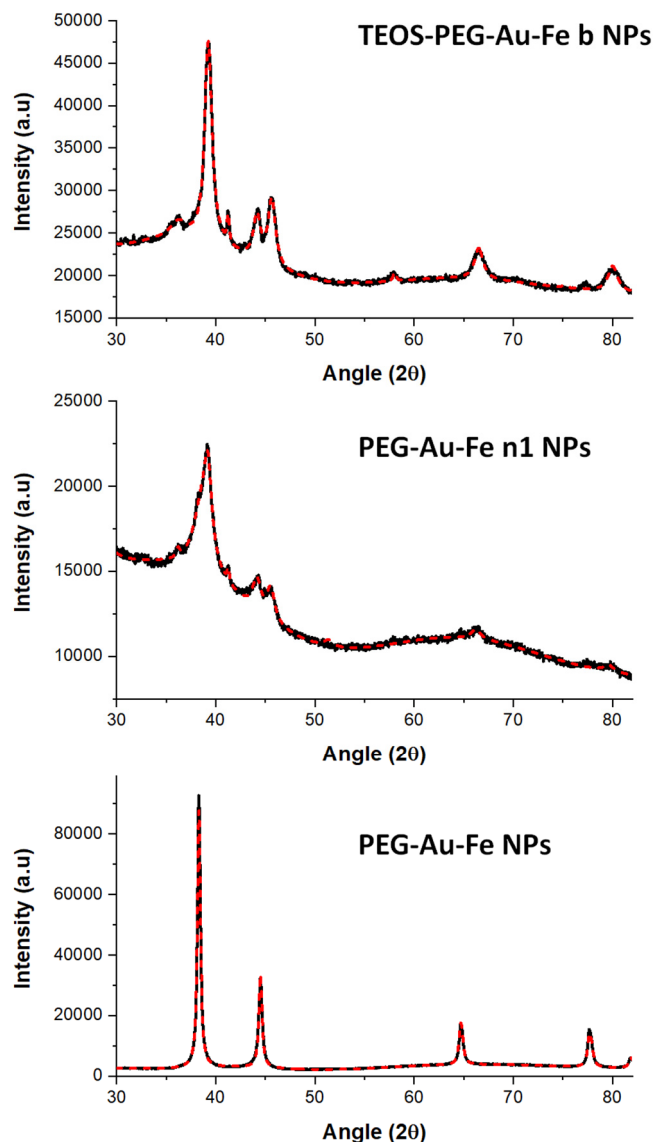

**Figure S1.** XRD pattern (continuous lines) and Rietveld refinement (dashed lines) of the PEG-Au, PEG-Au-Fe n1 and TEOS-PEG-Au-Fe b NPs samples. The Au NPs have the typical face centered cubic (FCC) lattice with a cell parameter in agreement with that of bulk gold ( $4.0775 \pm 0.0001 \text{ \AA}$ ). The Au-Fe NPs have the well-known disordered structure (large peaks) due to the metastability of the alloy, and two FCC components can be identified, one ascribable to an Au-rich alloy (cell parameter of  $4.0011 \pm 0.0022 \text{ \AA}$  for PEG-Au-Fe n1 and  $3.9783 \pm 0.0006 \text{ \AA}$  for TEOS-PEG-Au-Fe b) and another to iron-rich alloy (cell parameter  $3.5703 \pm 0.0020 \text{ \AA}$  for PEG-Au-Fe n1 and  $3.5558 \pm 0.0007 \text{ \AA}$  for TEOS-PEG-Au-Fe b). Therefore, the same phases are observed in the PEG-Au-Fe n1 and TEOS-PEG-Au-Fe b NPs samples.

## 2. FTIR of PEG-Au, PEG-Au-Fe n1 and TEOS-PEG-Au-Fe b NPs

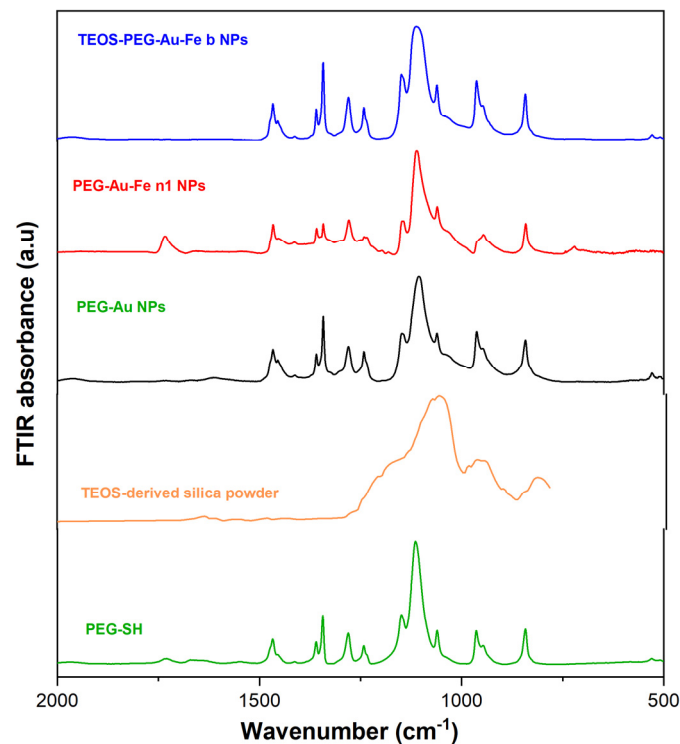

**Figure S2.** FTIR spectra of PEG-Au, PEG-Au-Fe n1 and TEOS-PEG-Au-Fe b NPs samples. In all cases, the peaks characteristic of PEG are well evident, indicating a comparable polymeric coating. The peaks of the TEOS-derived silica shell are difficult to identify below the intense PEG signals in the TEOS-PEG-Au-Fe b NPs sample.

### 3. Z-potential and DLS of PEG-Au, PEG-Au-Fe n1 and TEOS-PEG-Au-Fe b NPs

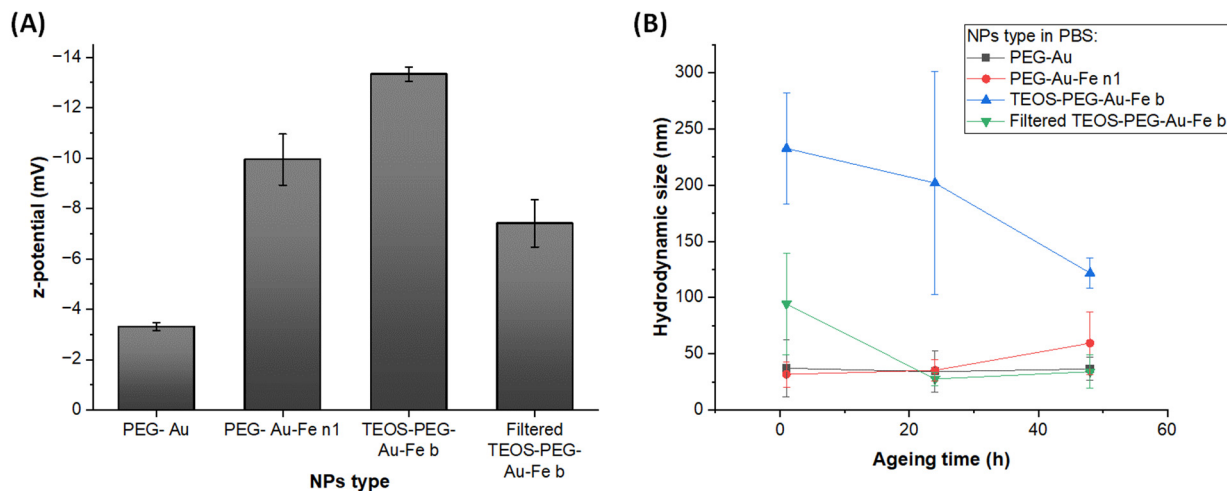

**Figure S3.** Z-potential (A) and DLS measured hydrodynamic size (B) of PEG-Au, PEG-Au-Fe n1 and TEOS-PEG-Au-Fe b NPs in phosphate buffered saline solution after ageing for 1, 24 and 48 h at 37 °C. The results for the TEOS-PEG-Au-Fe b NPs after filtration with a with a 200 nm pore size filter are also shown, indicating the size reduction to values similar to PEG-Au and PEG-Au-Fe n1 NPs. This is accompanied by a reduced cytotoxicity to values equivalent to the PEG-Au-Fe n1 NPs. Note the relatively low z-potential, suggesting the prevalence of a steric repulsion mechanism for the stability of the NPs.
